# Supplementary material for: Novel Phenotype–Genotype Correlations of Restrictive Cardiomyopathy With Myosin-Binding Protein C (MYBPC3) Gene Mutations Tested by Next-Generation Sequencing
Source: PubMed Central journal article supplement — J Am Heart Assoc. 2015 Jul 10;4(7):e001879. doi: 10.1161/JAHA.115.001879 (PMC4608072; doi:10.1161/jaha.115.001879), 2015-07-10
Supplement: jah30004-e001879-sd7.pdf [file jah30004-e001879-sd7.pdf]

## **SUPPLEMENTAL MATERIAL**

**Supplemental Table S1.** List of the genes selected to perform the custom array.

| <b>Gene Description (Functional classes)</b>               | <b>Gene</b>   | <b>trIDs*</b>                                   | <b>Chr†</b> | <b>Segs (n)‡</b> | <b>Segs (bp) §</b> | <b>Transc (n) ¶</b> |
|------------------------------------------------------------|---------------|-------------------------------------------------|-------------|------------------|--------------------|---------------------|
| <b>CARDIOMYOPATHY-ASSOCIATED</b>                           |               |                                                 |             |                  |                    |                     |
| actin, alpha 1, skeletal muscle                            | <i>ACTA1</i>  | NM_001100                                       | 1           | 1                | 3852               | 1                   |
| cardiac muscle alpha actin 1 proprotein                    | <i>ACTC1</i>  | NM_005159                                       | 15          | 2                | 8523               | 1                   |
| calreticulins                                              | <i>CALR3</i>  | NM_145046                                       | 19          | 7                | 8574               | 1                   |
| Ca-binding chaperons                                       |               |                                                 |             |                  |                    |                     |
| calsequestrin 2 (cardiac muscle)                           | <i>CASQ2</i>  | NM_001232                                       | 1           | 11               | 13711              | 1                   |
| caveolin 3≠                                                | <i>CAV3</i>   | NM_001234,NM_033337                             | 3           | 2                | 3423               | 2                   |
| cytochrome c oxidase assembly protein≠                     | <i>COX15</i>  | NM_078470,NM_004376                             | 10          | 8                | 15983              | 2                   |
| cysteine and glycine-rich protein 3≠                       | <i>CSRP3</i>  | NM_003476,NM_001127656                          | 11          | 6                | 7347               | 2                   |
| Desmin                                                     | <i>DES</i>    | NM_001927                                       | 2           | 4                | 7255               | 1                   |
| frataxin≠                                                  | <i>FXN</i>    | NM_000144,NM_181425                             | 9           | 5                | 7275               | 2                   |
| junctophilin≠                                              | <i>JPH2</i>   | NM_020433,NM_175913                             | 20          | 6                | 12735              | 2                   |
| lysosomal-associated membrane protein≠                     | <i>LAMP2</i>  | NM_002294,NM_001122606,NM_013995                | X           | 8                | 19044              | 3                   |
| LIM domain binding 3                                       | <i>LDB3</i>   | NM_001080115,NM_01080114,NM_001080116,NM_007078 | 10          | 13               | 21033              | 4                   |
| myosin binding protein C, cardiac                          | <i>MYBPC3</i> | NM_000256                                       | 11          | 7                | 19751              | 1                   |
| myosin, heavy chain 6, cardiac muscle, alpha               | <i>MYH6</i>   | NM_002471                                       | 14          | 8                | 24026              | 1                   |
| myosin, heavy chain 7, cardiac muscle, beta                | <i>MYH7</i>   | NM_000257                                       | 14          | 4                | 23206              | 1                   |
| slow cardiac myosin                                        |               |                                                 |             |                  |                    |                     |
| regulatory light chain 2                                   | <i>MYL2</i>   | NM_000432                                       | 12          | 5                | 6796               | 1                   |
| myosin, light chain 3, alkali; ventricular, skeletal, slow | <i>MYL3</i>   | NM_000258                                       | 3           | 4                | 5307               | 1                   |
| myosin light chain                                         | <i>MYLK2</i>  | NM_033118                                       | 20          | 5                | 10877              | 1                   |

|                                                      |                              |                                                                                                                                                                                                                                  |        |        |               |        |
|------------------------------------------------------|------------------------------|----------------------------------------------------------------------------------------------------------------------------------------------------------------------------------------------------------------------------------|--------|--------|---------------|--------|
| kinase 2                                             |                              |                                                                                                                                                                                                                                  |        |        |               |        |
| myosin VI                                            | <i>MYO6</i>                  | NM_004999                                                                                                                                                                                                                        | 6      | 28     | 40652         | 1      |
| myozenin 2                                           | <i>MYOZ2</i>                 | NM_016599                                                                                                                                                                                                                        | 4      | 5      | 8124          | 1      |
| NADH dehydrogenase<br>(ubiquinone)<br>flavoprotein 2 | <i>NDUFV2</i>                | NM_021074                                                                                                                                                                                                                        | 18     | 7      | 7918          | 1      |
| obscurin, cytoskeletal<br>calmodulin≠                | <i>OBSCN</i>                 | NM_052843,NM_0010<br>98623                                                                                                                                                                                                       | 1      | 23     | 82957         | 2      |
| phospholamban                                        | <i>PLN</i>                   | NM_002667                                                                                                                                                                                                                        | 6      | 2      | 3716          | 1      |
| AMP-activated protein<br>kinase gamma2<br>subunit≠   | <i>PRKAG2</i>                | NM_024429,NM_0010<br>40633,NM_016203                                                                                                                                                                                             | 7      | 16     | 20335         | 3      |
| solute carrier family 25<br>sorcina≠                 | <i>SLC25A4</i><br><i>SRI</i> | NM_001151<br>NM_198901,NM_0031<br>30                                                                                                                                                                                             | 4<br>7 | 2<br>6 | 4750<br>10155 | 1<br>2 |
| titin-cap (telethonin)                               | <i>TCAP</i>                  | NM_003673                                                                                                                                                                                                                        | 17     | 1      | 2210          | 1      |
| troponin C type 1                                    | <i>TNNC1</i>                 | NM_003280                                                                                                                                                                                                                        | 3      | 2      | 3474          | 1      |
| troponin I, cardiac                                  | <i>TNNI3</i>                 | NM_000363                                                                                                                                                                                                                        | 19     | 3      | 5486          | 1      |
| troponin T type 2,<br>cardiac≠                       | <i>TNNT2</i>                 | NM_001001430,NM_0<br>00364,NM_001001431,<br>NM_001001432<br>NM_001018005,NM_0<br>01018004,NM_0010180<br>08,NM_000366,NM_00<br>1018020,NM_00101800<br>7,NM_001018006<br>NM_003319,NM_1333<br>78,NM_133432,NM_13<br>3437,NM_133379 | 1      | 8      | 14014         | 4      |
| tropomyosin 1 alpha<br>chain≠                        | <i>TPM1</i>                  | NM_000366,NM_00<br>1018020,NM_00101800<br>7,NM_001018006<br>NM_003319,NM_1333<br>78,NM_133432,NM_13<br>3437,NM_133379                                                                                                            | 15     | 8      | 14192         | 7      |
| titina≠                                              | <i>TTN</i>                   | NM_003319,NM_1333<br>78,NM_133432,NM_13<br>3437,NM_133379                                                                                                                                                                        | 2      | 44     | 229584        | 5      |
| vinculin isoform<br>meta-VCL≠                        | <i>VCL</i>                   | NM_014000,NM_0033<br>73                                                                                                                                                                                                          | 10     | 18     | 25559         | 2      |
| integrin, alpha 8                                    | <i>ITGA8</i>                 | NM_003638                                                                                                                                                                                                                        | 10     | 26     | 31822         | 1      |
| cardiac ankyrin repeat<br>protein                    | <i>CARP</i>                  | NM_014391                                                                                                                                                                                                                        | 10     | 4      | 8118          | 1      |
| v-raf-1 murine<br>leukemia viral                     | <i>RAF1</i>                  | NM_002880                                                                                                                                                                                                                        | 3      | 10     | 15534         | 1      |
| oncogene homolog 1                                   |                              |                                                                                                                                                                                                                                  |        |        |               |        |

---

#### METABOLIC HCM

|                        |            |              |    |    |       |   |
|------------------------|------------|--------------|----|----|-------|---|
| acid-alpha glucosidase | <i>GAA</i> | NM_000152    | 17 | 5  | 14287 | 1 |
| amilo-1-6-glucosidase  | <i>AGL</i> | NM_000642    | 1  | 19 | 31359 | 1 |
| acid-beta glucosidase  | <i>GBA</i> | NM_001005741 | 1  | 2  | 8923  | 1 |

---

#### ION CHANNELS

|                                     |              |                         |    |    |       |   |
|-------------------------------------|--------------|-------------------------|----|----|-------|---|
| potassium<br>voltage-gated channel, | <i>KCNQ1</i> | NM_181798,NM_0002<br>18 | 11 | 12 | 19308 | 2 |
|-------------------------------------|--------------|-------------------------|----|----|-------|---|

|                                                                          |                |                                                                                                                                                                                                                                                                                                                                                                            |    |    |       |    |
|--------------------------------------------------------------------------|----------------|----------------------------------------------------------------------------------------------------------------------------------------------------------------------------------------------------------------------------------------------------------------------------------------------------------------------------------------------------------------------------|----|----|-------|----|
| KQT-like≠                                                                |                |                                                                                                                                                                                                                                                                                                                                                                            |    |    |       |    |
| potassium channel<br>voltage-gated,<br>subfamily H≠                      | <i>KCNH2</i>   | NM_172056,NM_0002<br>38,NM_172057                                                                                                                                                                                                                                                                                                                                          | 7  | 7  | 15667 | 3  |
| potassium channel<br>voltage-gated<br>ISK-related subfamily<br>member 1≠ | <i>KCNE1</i>   | NM_000219,NM_0011<br>27670,NM_001127669,<br>NM_001127668                                                                                                                                                                                                                                                                                                                   | 21 | 4  | 8545  | 4  |
| potassium channel<br>voltage-gated<br>ISK-related subfamily<br>member 2  | <i>KCNE2</i>   | NM_172201                                                                                                                                                                                                                                                                                                                                                                  | 21 | 2  | 2805  | 1  |
| sodium channel,<br>voltage-gated, type V,<br>alpha subunit≠              | <i>SCN5A</i>   | NM_198056,NM_0010<br>99405,NM_001099404,<br>NM_000335<br>NM_001129830,NM_0<br>01129827,NM_0011298<br>29,NM_000719,NM_00<br>1129831,NM_00112983<br>9,NM_001129836,NM_<br>001129833,NM_001129<br>832,NM_001129834,N<br>M_001129835,NM_001<br>129837,NM_001129838<br>,NM_001129840,NM_0<br>01129841,NM_0011298<br>42,NM_001129843,NM<br>_001129844,NM_00112<br>9846,NM_199460 | 3  | 23 | 35206 | 4  |
| calcium channel,<br>voltage-dependent,<br>L-type, alpha-1C<br>subunit ≠  | <i>CACNA1C</i> |                                                                                                                                                                                                                                                                                                                                                                            | 12 | 37 | 58658 | 20 |
| sodium channel,<br>voltage-gated, type IV,<br>beta subunit               | <i>SCN4B</i>   | NM_174934                                                                                                                                                                                                                                                                                                                                                                  | 11 | 4  | 9483  | 1  |
| potassium channel,<br>inwardly rectifying,<br>subfamily J, member2       | <i>KCNJ2</i>   | NM_000891                                                                                                                                                                                                                                                                                                                                                                  | 17 | 2  | 7388  | 1  |
| <b>MEMBRANE CHANNELS</b>                                                 |                |                                                                                                                                                                                                                                                                                                                                                                            |    |    |       |    |
| solute carrier family 9,<br>isoform A3                                   | <i>SLC9A3</i>  | NM_004174                                                                                                                                                                                                                                                                                                                                                                  | 5  | 8  | 14281 | 1  |
| solute carrier family 9,<br>isoform A2                                   | <i>SLC9A2</i>  | NM_003048                                                                                                                                                                                                                                                                                                                                                                  | 2  | 10 | 16646 | 1  |
| solute carrier family 9,<br>isoform A4                                   | <i>SLC9A4</i>  | NM_001011552                                                                                                                                                                                                                                                                                                                                                               | 2  | 11 | 15714 | 1  |
| ATPase<br>Ca(2+)-transporting,                                           | <i>ATP2A2</i>  | NM_001681,NM_1706<br>65                                                                                                                                                                                                                                                                                                                                                    | 12 | 10 | 23130 | 2  |

slow-twitch≠

|                                      |                                    |           |    |   |       |   |
|--------------------------------------|------------------------------------|-----------|----|---|-------|---|
| solute carrier family 6,<br>member 4 | <i>SLC6A4</i><br>( <i>SLC6A4</i> ) | NM_001045 | 17 | 9 | 15765 | 1 |
|--------------------------------------|------------------------------------|-----------|----|---|-------|---|

### GROWTH FACTORS

|                                          |                                                   |                                                          |    |   |       |   |
|------------------------------------------|---------------------------------------------------|----------------------------------------------------------|----|---|-------|---|
| transforming growth<br>factor, beta 1    | <i>TGF-<math>\beta</math></i><br>( <i>TGFB1</i> ) | NM_000660                                                | 19 | 5 | 8407  | 1 |
| fibroblast growth factor<br>1 (acidic) ≠ | <i>FGFa</i><br>( <i>FGF1</i> )                    | NM_000800,NM_0331<br>37,NM_033136                        | 5  | 4 | 6346  | 3 |
| insulin-like growth<br>factor 1≠         | <i>IGF1</i>                                       | NM_001111285,NM_0<br>01111284,NM_0011112<br>83,NM_000618 | 12 | 6 | 13820 | 4 |
| early growth response<br>1               | <i>EGR1</i>                                       | NM_001964                                                | 5  | 1 | 4825  | 1 |
| insulin like growth<br>factor 2≠         | <i>IGF2</i>                                       | NM_001127598,NM_0<br>00612,NM_001007139                  | 11 | 6 | 13161 | 3 |

### FACTORS INVOLVED IN CARDIOMYOCYTE GROWTH AND CONTRACTILITY

|                                 |              |                                                           |    |    |       |   |
|---------------------------------|--------------|-----------------------------------------------------------|----|----|-------|---|
| beta1 adrenergic<br>receptor 1  | <i>ADRB1</i> | NM_000684                                                 | 10 | 1  | 3863  | 1 |
| angiotensin receptor 1≠         | <i>AGTR1</i> | NM_004835,NM_0006<br>85,NM_032049,NM_00<br>9585,NM_031850 | 3  | 5  | 7576  | 5 |
| endothelin 1                    | <i>EDN1</i>  | NM_001955                                                 | 6  | 4  | 6268  | 1 |
| endothelin receptor,<br>type A  | <i>EDNRA</i> | NM_001957                                                 | 4  | 7  | 11745 | 1 |
| angiotensinogen                 | <i>AGT</i>   | NM_000029                                                 | 1  | 4  | 7451  | 1 |
| endothelin receptor.<br>Type B≠ | <i>EDNRB</i> | NM_000115,NM_0039<br>91,NM_001122659                      | 13 | 5  | 10584 | 3 |
| Protein kinase C, alpha         | <i>PRKCA</i> | NM_002737                                                 | 17 | 15 | 25199 | 1 |

\* trIDs: transcripts identification

†chr: chromosome

‡Segs (n): number of segments

§Segs (bp): length (bp) of the screened gene regions

¶Transc (n): number of transcripts captured

≠: more than one transcript was captured

## **Supplemental Videos legends:**

### **Supplemental Video 1**

Parasternal long axis view of III4 by echocardiography: enlarged LA, normal LV size and wall thickness, and mild pericardial effusion. Papillary muscle is easy to be muddled with posterior wall.

### **Supplemental Video 2**

LV short axis view with mitral valve section of III4 by echocardiography: normal LV size and wall thickness.

### **Supplemental Video 3**

LV short axis with papillary muscle section of III4 by echocardiography: normal LV size and wall thickness. Papillary muscle is easy to be muddled with posterior wall.

### **Supplemental Video 4**

Reversed apical four-chamber view of III4 by echocardiography: significant biatrial enlargement, normal biventricular size. Papillary muscle can be differentiated from ventricular wall. Foggy blood flow from LA to LV indicates slow flow in cardiac diastolic phase.

### **Supplemental Video 5**

Animated movie of cardiac magnetic resonance of III6: enlargement of LA, normal LV size and wall thickness.

### **Supplemental Video 6**

Long axis view of patient 4 by echocardiography: enlarged LA, normal LV size and wall thickness.

**Supplemental Figure and legend:**

**Supplemental Figure S1**

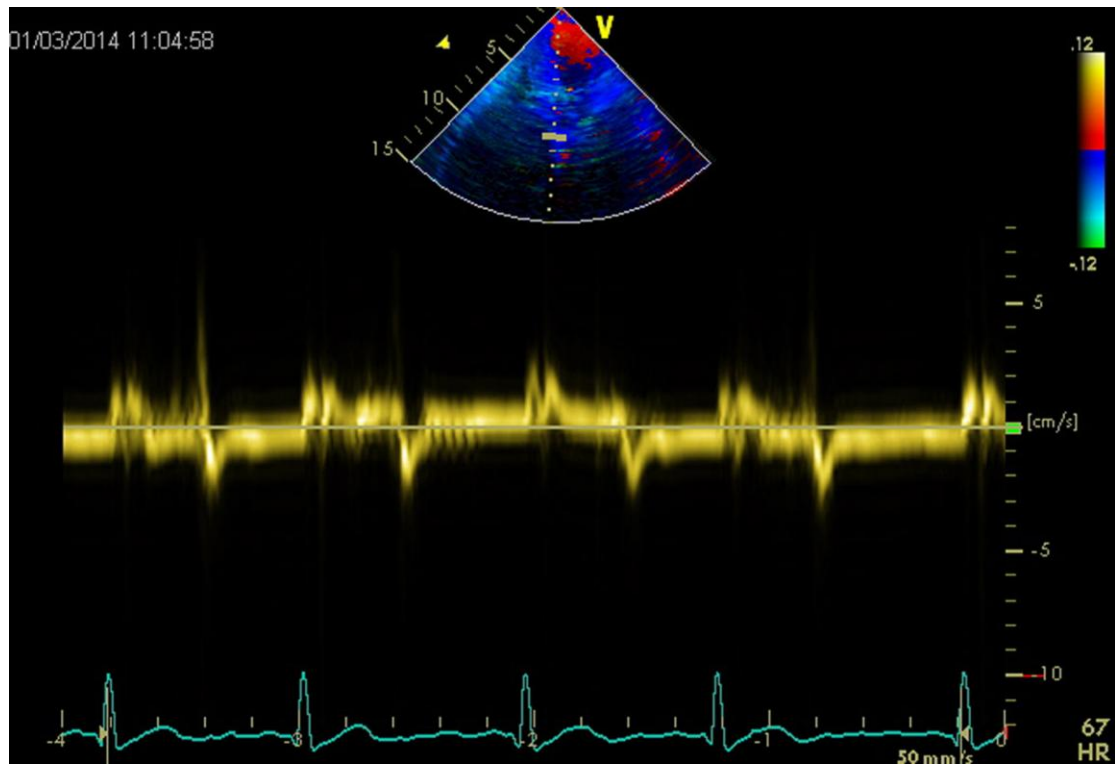

**Supplemental Figure S1**

Echocardiography of III4 shows reduced septal mitral annulus velocity ( $e'$ ) by Tissue Doppler Image.
